# Supplementary material for: Specific features of electronic structures and optical susceptibilities of molybdenum oxide
Source: Royal Society of Chemistry journal article supplement (doi:10.1039/c5ra00081e), 2015-01-01
Supplement: c5ra00081e1.pdf [file c5ra00081e1.pdf]

## Specific Features of Electronic Structures and Optical Susceptibilities of Molybdenum Oxide

A. H. Reshak<sup>1,2,\*</sup>

<sup>1</sup>*New Technologies - Research Centre, University of West Bohemia, Univerzitni 8, 306 14 Pilsen, Czech Republic*

<sup>2</sup>*Center of Excellence Geopolymer and Green Technology, School of Material Engineering, University Malaysia Perlis, 01007 Kangar, Perlis, Malaysia*

### Supporting information

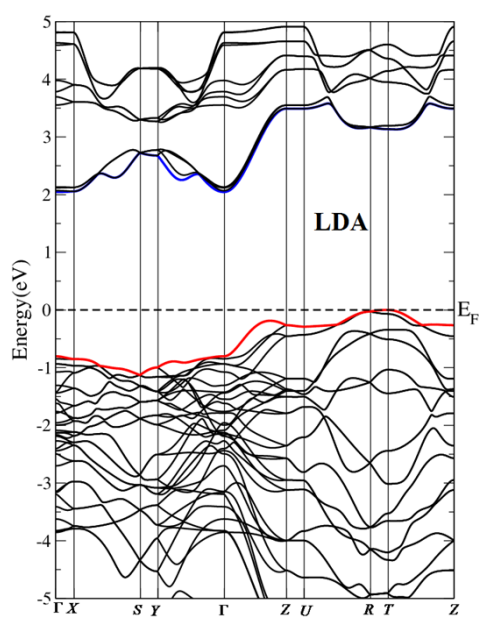

(a)

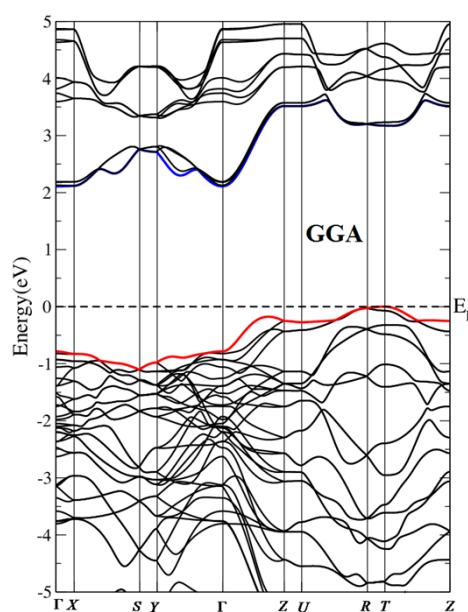

(b)

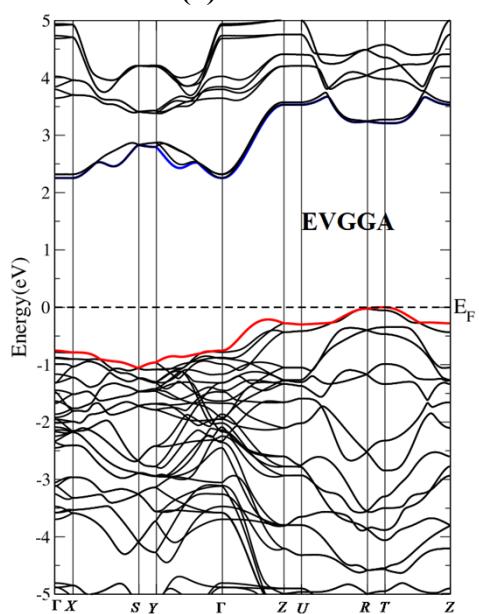

(c)

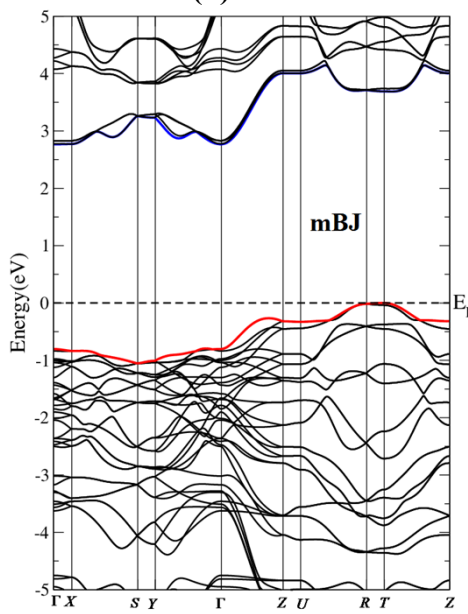

(d)

**Fig. S1:** The calculated electronic band structure of  $\alpha - MoO_3$  using; (a) *LDA*; (b) *GGA*; (c) *EVGGA*; (d) *mBJ*.

**Table S1:** The calculated energy band gaps in comparison with the experimental value.

| Eg (eV) |        |        |       |                                      |
|---------|--------|--------|-------|--------------------------------------|
| LDA     | GGA    | EVGGA  | mBJ   | Eg (Exp.)                            |
| 2.050*  | 2.114* | 2.257* | 2.81* | 3.03 <sup>a</sup> , 3.1 <sup>b</sup> |

\*This work

<sup>a</sup>Ref. 25, <sup>b</sup>Ref. 6

**Table S2:** The calculated  $\epsilon_1^{xx}(0)$ ,  $\epsilon_1^{yy}(0)$ ,  $\epsilon_1^{zz}(0)$  and  $\epsilon_1^{av}(0)$ .

|                      | LDA  | GGA  | EVGGA | mBJ  |
|----------------------|------|------|-------|------|
| $\epsilon_1^{xx}(0)$ | 5.95 | 5.85 | 5.54  | 4.80 |
| $\epsilon_1^{yy}(0)$ | 5.61 | 5.49 | 5.24  | 4.32 |
| $\epsilon_1^{zz}(0)$ | 6.30 | 6.15 | 5.82  | 5.03 |
| $\epsilon_1^{av}(0)$ | 3.87 | 3.79 | 3.6   | 3.05 |
